# Supplementary material
Source: publisher figshare collection journal article supplement (https://frontiersin.figshare.com/ndownloader/files/30749536)
Supplement: Supplementary file [file 30749536]

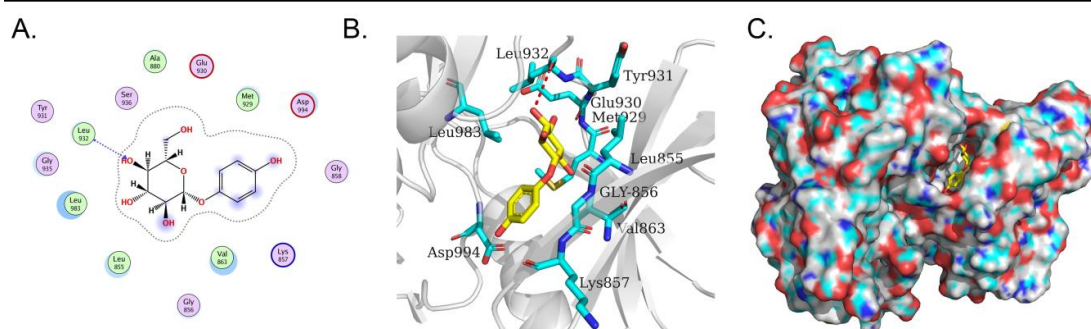

**Supplementary figure 1. Molecular docking between arbutin and JAK2 protein.** (A) The 2D binding mode of STOCK1N-07141 with JAK2. (B) The 3D binding mode of STOCK1N-07141 with JAK2. (C) The 3D surface binding mode of STOCK1N-07141 with JAK2. The compound is colored in yellow, the surrounding residues in the binding pockets are colored in cyan. The backbone of the receptor is depicted as gray90 cartoon.
